# Supplementary material for: Controlling electron transfer in a lateral near-infrared polymer photodetector by adding higher-LUMO-level acceptors: a pathway to reduce dark current
Source: Royal Society of Chemistry journal article supplement (doi:10.1039/d3tc04263d), 2024-01-01
Supplement: d3tc04263d1.pdf [file d3tc04263d1.pdf]

## Supporting Information for

### **Controlling Electron Transfer in a Lateral Near-Infrared Polymer Photodetector by Adding Higher-LUMO-Level Acceptors: A Technique to Reduce Dark Current**

Tao Han<sup>\*,1,2</sup>, Xiaoting Li<sup>1</sup>, Junjie Zhang<sup>1</sup>, Wenjun Tang<sup>1</sup>, Sirong Jiang<sup>1</sup>, Changle Pan<sup>1</sup>,  
Yue Qian<sup>1</sup>, Shufang Ding<sup>1</sup>, Yaqi Chen<sup>1</sup>, Chunzhi Jiang<sup>1</sup>

<sup>1</sup> Microelectronics and Optoelectronics Technology Key Laboratory of Hunan Higher Education, School of Physics and Electronic Electrical Engineering, Xiangnan University, Chenzhou 423000, P. R. China.

<sup>2</sup> Hunan Provincial Key Laboratory of Xiangnan Rare-Precious Metals Compounds Research and Application, Xiangnan University, Chenzhou 423000, P. R. China.

\* Corresponding authors: Tao Han ([than@xnu.edu.cn](mailto:than@xnu.edu.cn)).

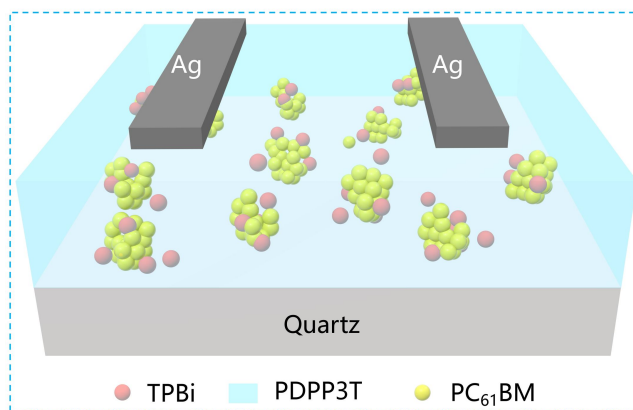

**Supplementary Fig. 1 Structure of TPBi:PC<sub>61</sub>BM:PDPP3T L-PPD.**

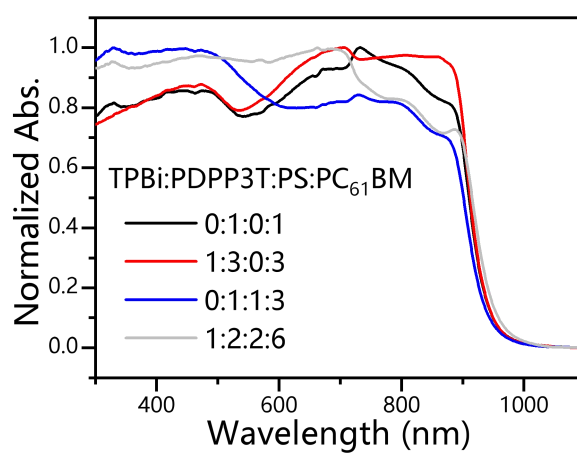

**Supplementary Fig. 2 UV-vis absorption spectra of different films.**

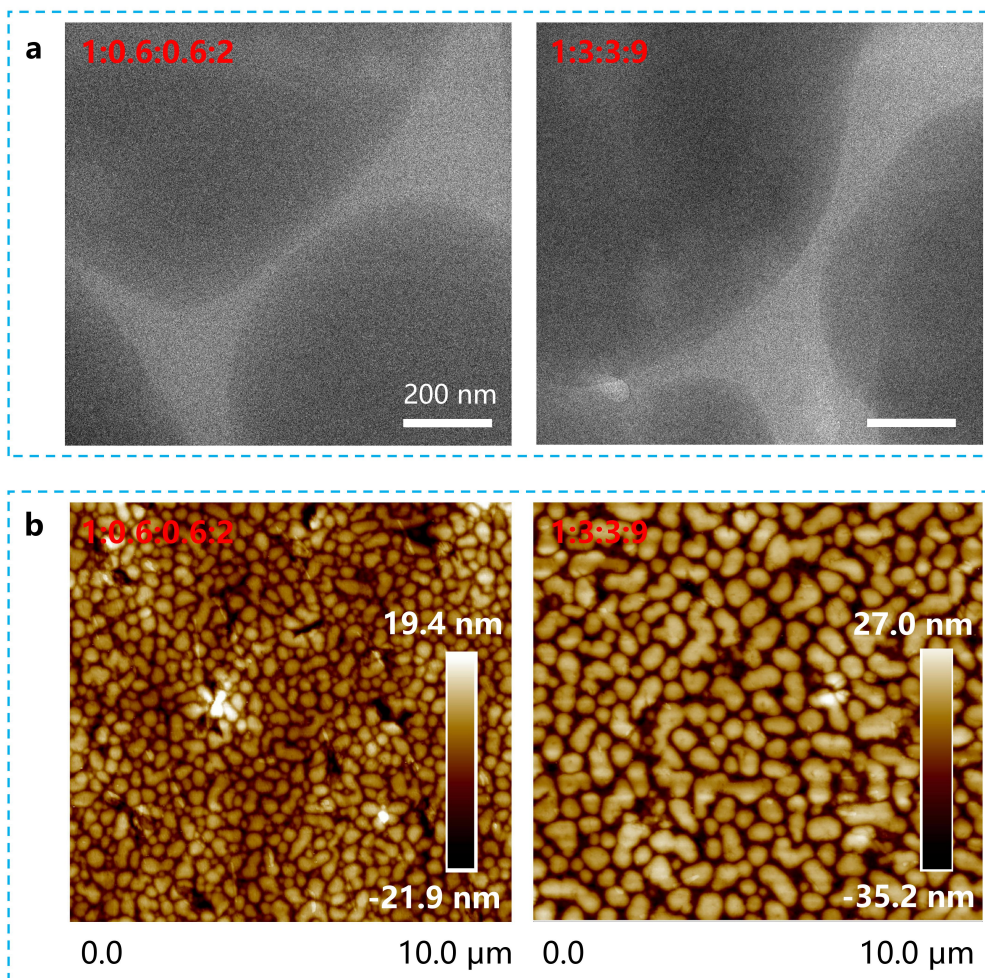

Supplementary Fig. 3 TEM of different films.

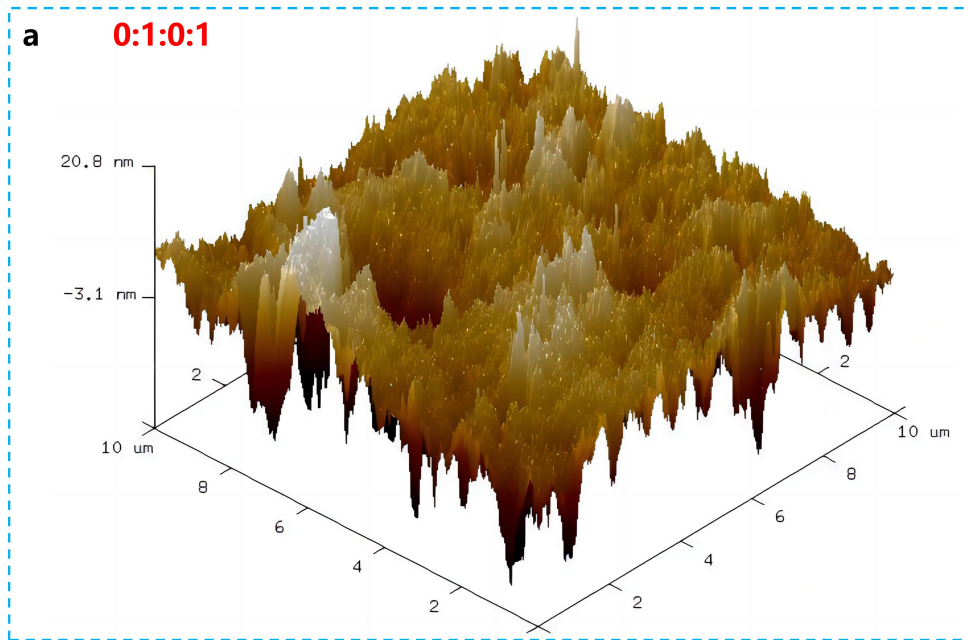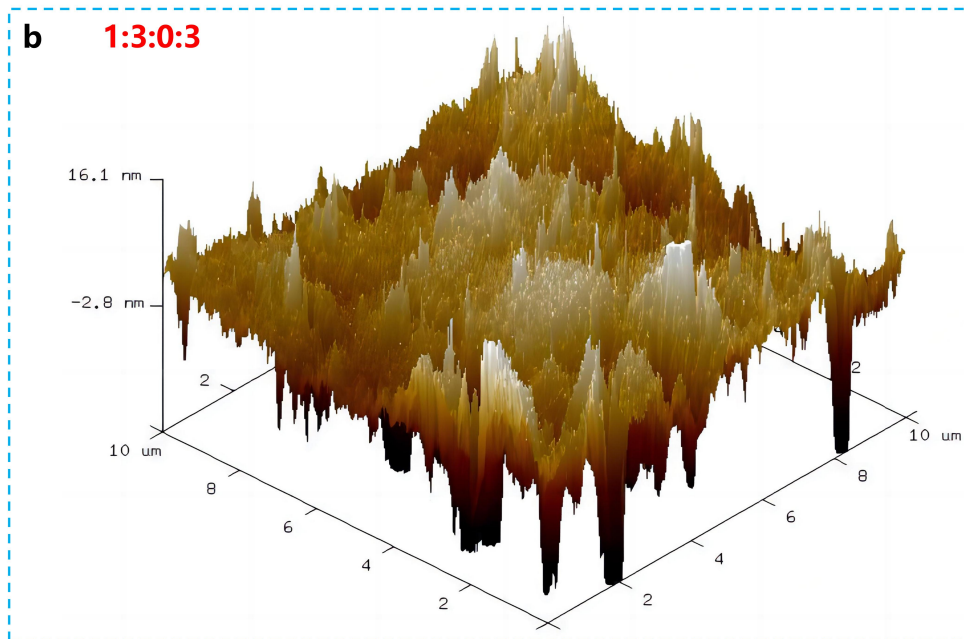

**Supplementary Fig. 4 AFM of films with different ratios. a 0:1:0:1. b 1:3:0:3.**

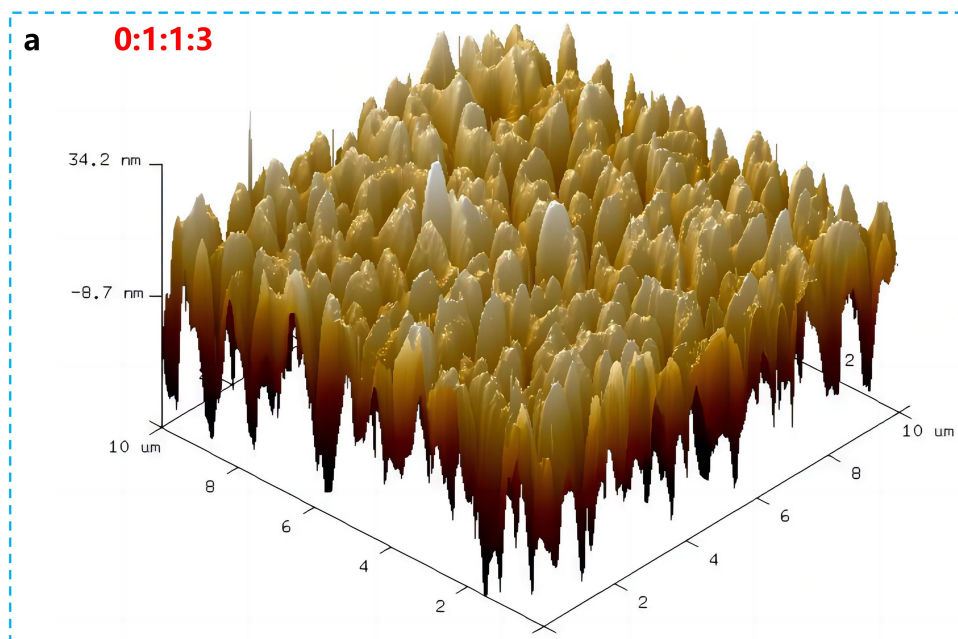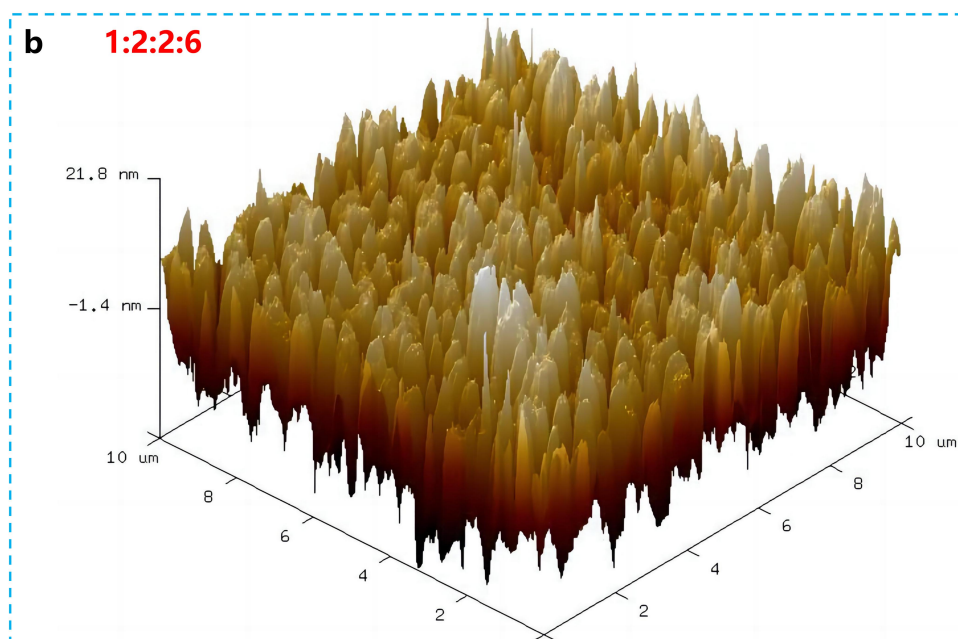

**Supplementary Fig. 5 AFM of films with different ratios. a 0:1:1:3. b 1:2:2:6.**

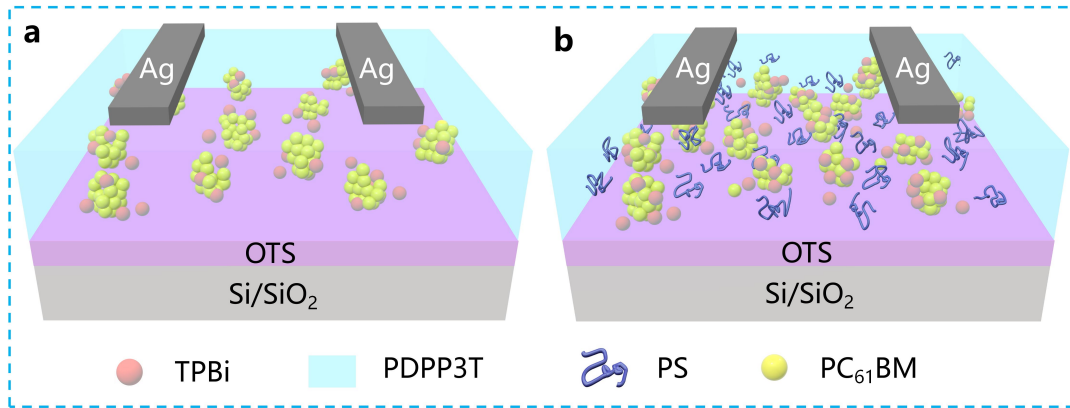

**Supplementary Fig. 6 Structures of phototransistors. a** Si/SiO<sub>2</sub>/OTS/TPBi:PDPP3T:PC<sub>61</sub>BM device. **b** Si/SiO<sub>2</sub>/OTS/TPBi:PDPP3T:PS:PC<sub>61</sub>BM device.

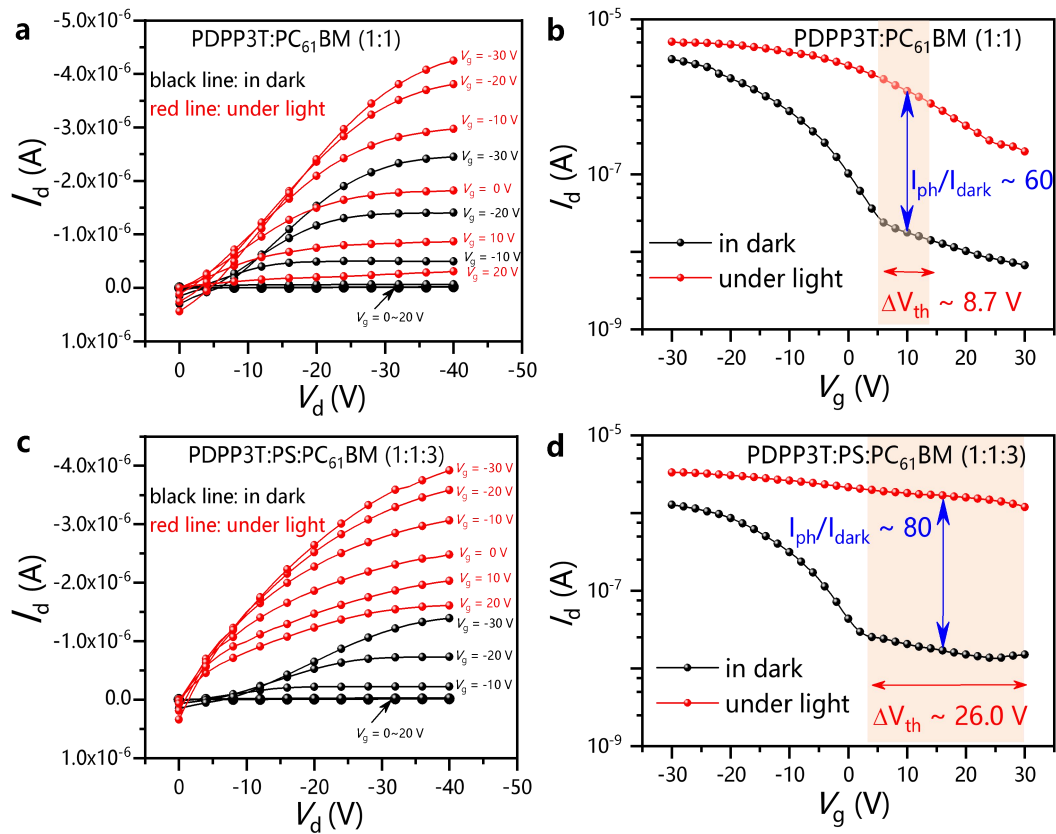

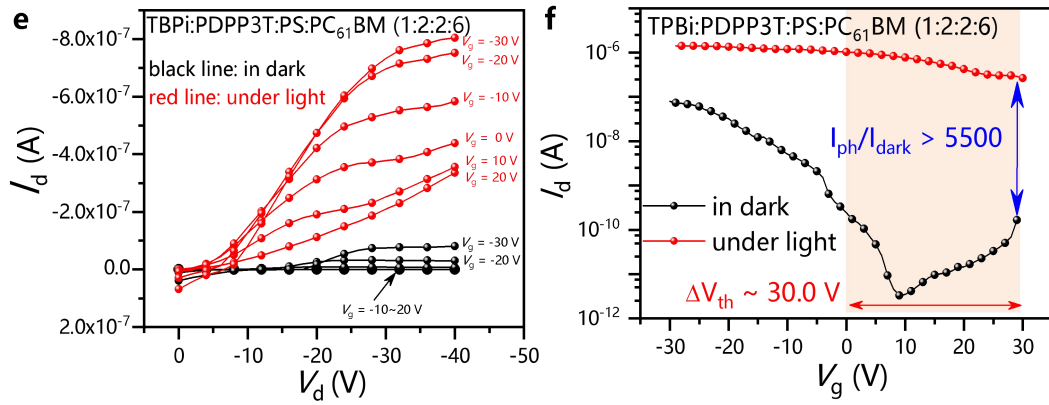

**Supplementary Fig. 7 Electrical properties of phototransistors with different doping ratios.** Output curve **a** and transfer curve **b** of Si/SiO<sub>2</sub>/OTS/PDPP3T:PC<sub>61</sub>BM device with 1:1 ratio. Output curve **c** and transfer curve **d** of Si/SiO<sub>2</sub>/OTS/PDPP3T:PS:PC<sub>61</sub>BM device with 1:1:3 ratio. Output curve **e** and transfer curve **f** of Si/SiO<sub>2</sub>/OTS/TPBi:PDPP3T:PS:PC<sub>61</sub>BM device with 1:2:2:6 ratio. The light intensity is 0.13 mW/cm<sup>2</sup> @ 850 nm. The transfer curves were tested with V<sub>d</sub> = -30 V. ΔV<sub>th</sub> is response window of device.

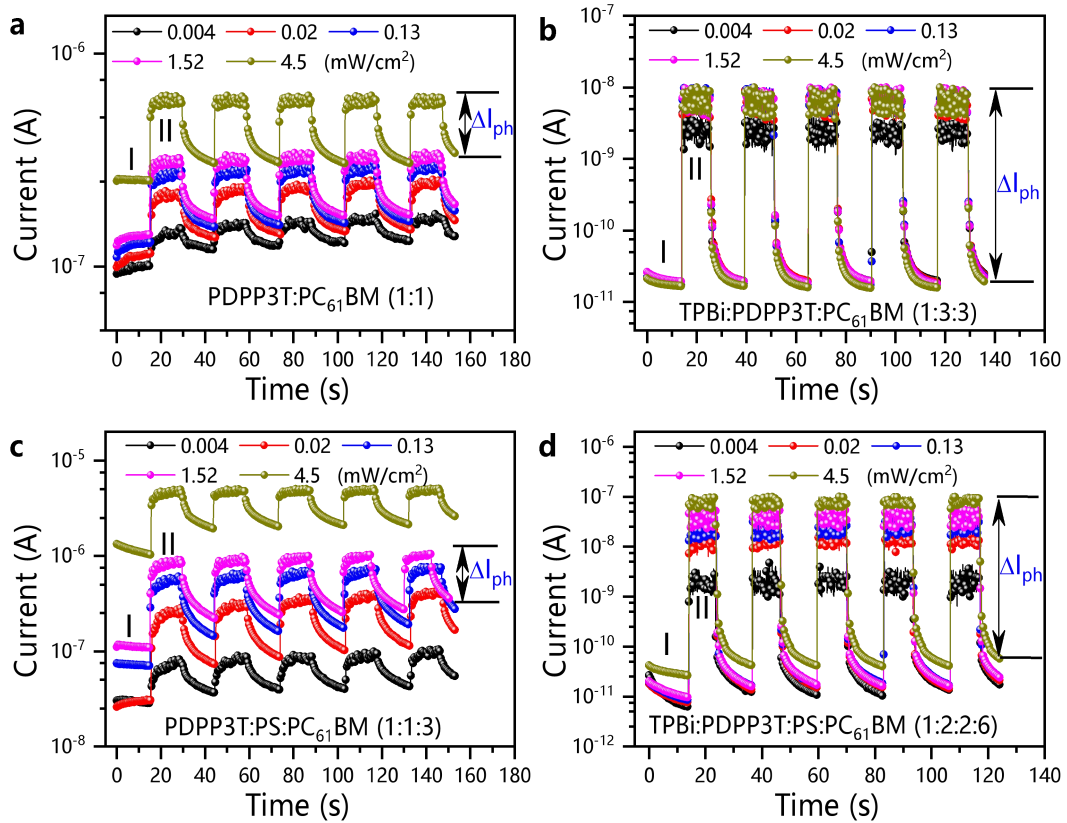

**Supplementary Fig. 8 I-Time curves of TPBi:PDPP3T:PS:PC<sub>61</sub>BM L-PPDs with**

different doping ratios exposed to the 850 nm laser. **a** PDPP3T:PC<sub>61</sub>BM L-PPD with 1:1 ratio. **b** TPBi:PDPP3T:PC<sub>61</sub>BM L-PPD with 1:3:3 ratio. **c** PDPP3T:PS:PC<sub>61</sub>BM L-PPD with 1:1:3 ratio. **d** TPBi:PDPP3T:PS:PC<sub>61</sub>BM L-PPD with 1:2:2:6 ratio. The bias were added at a constant  $V = -20$  V during the  $I$ -Time curves tested.

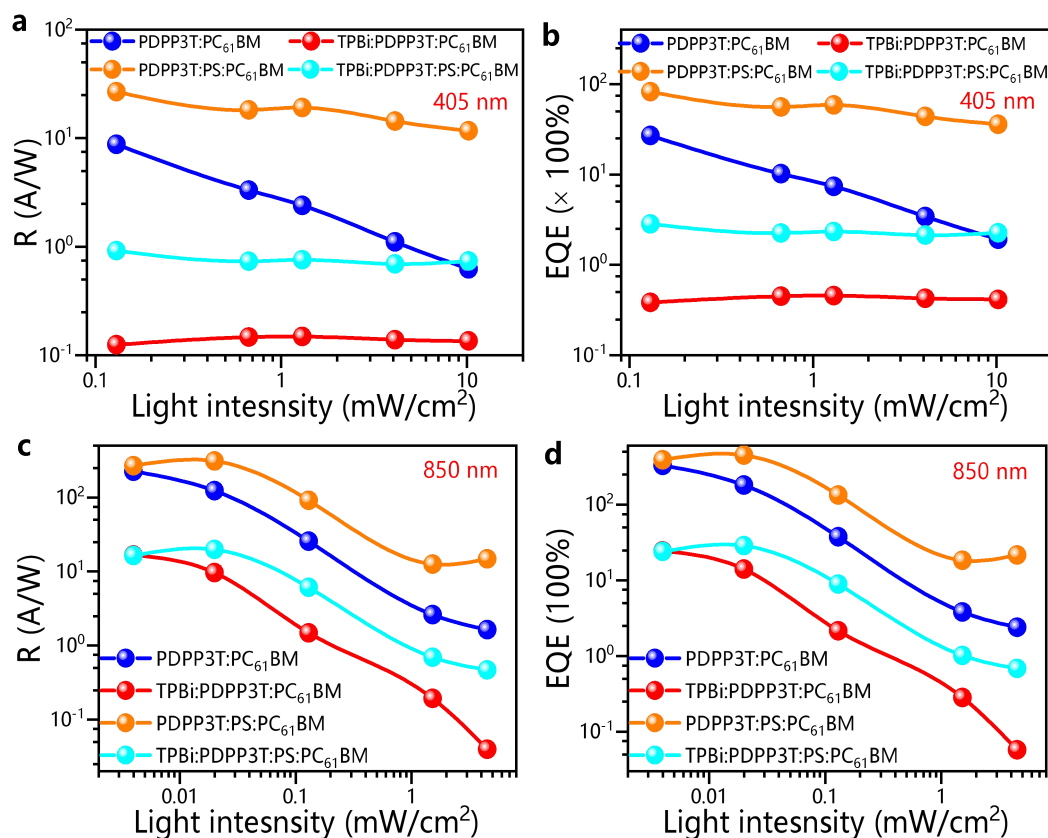

**Supplementary Fig. 9 Electrical properties of TPBi:PDPP3T:PS:PC<sub>61</sub>BM L-PPDs with different doping ratios exposed to the 405 nm and 850 nm laser. a** Dependence of  $R$  on light intensity at 405 nm laser. **b** Dependence of EQE on light intensity at 405 nm laser. **c** Dependence of  $R$  on light intensity at 850 nm laser. **d** Dependence of EQE on light intensity at 850 nm laser.



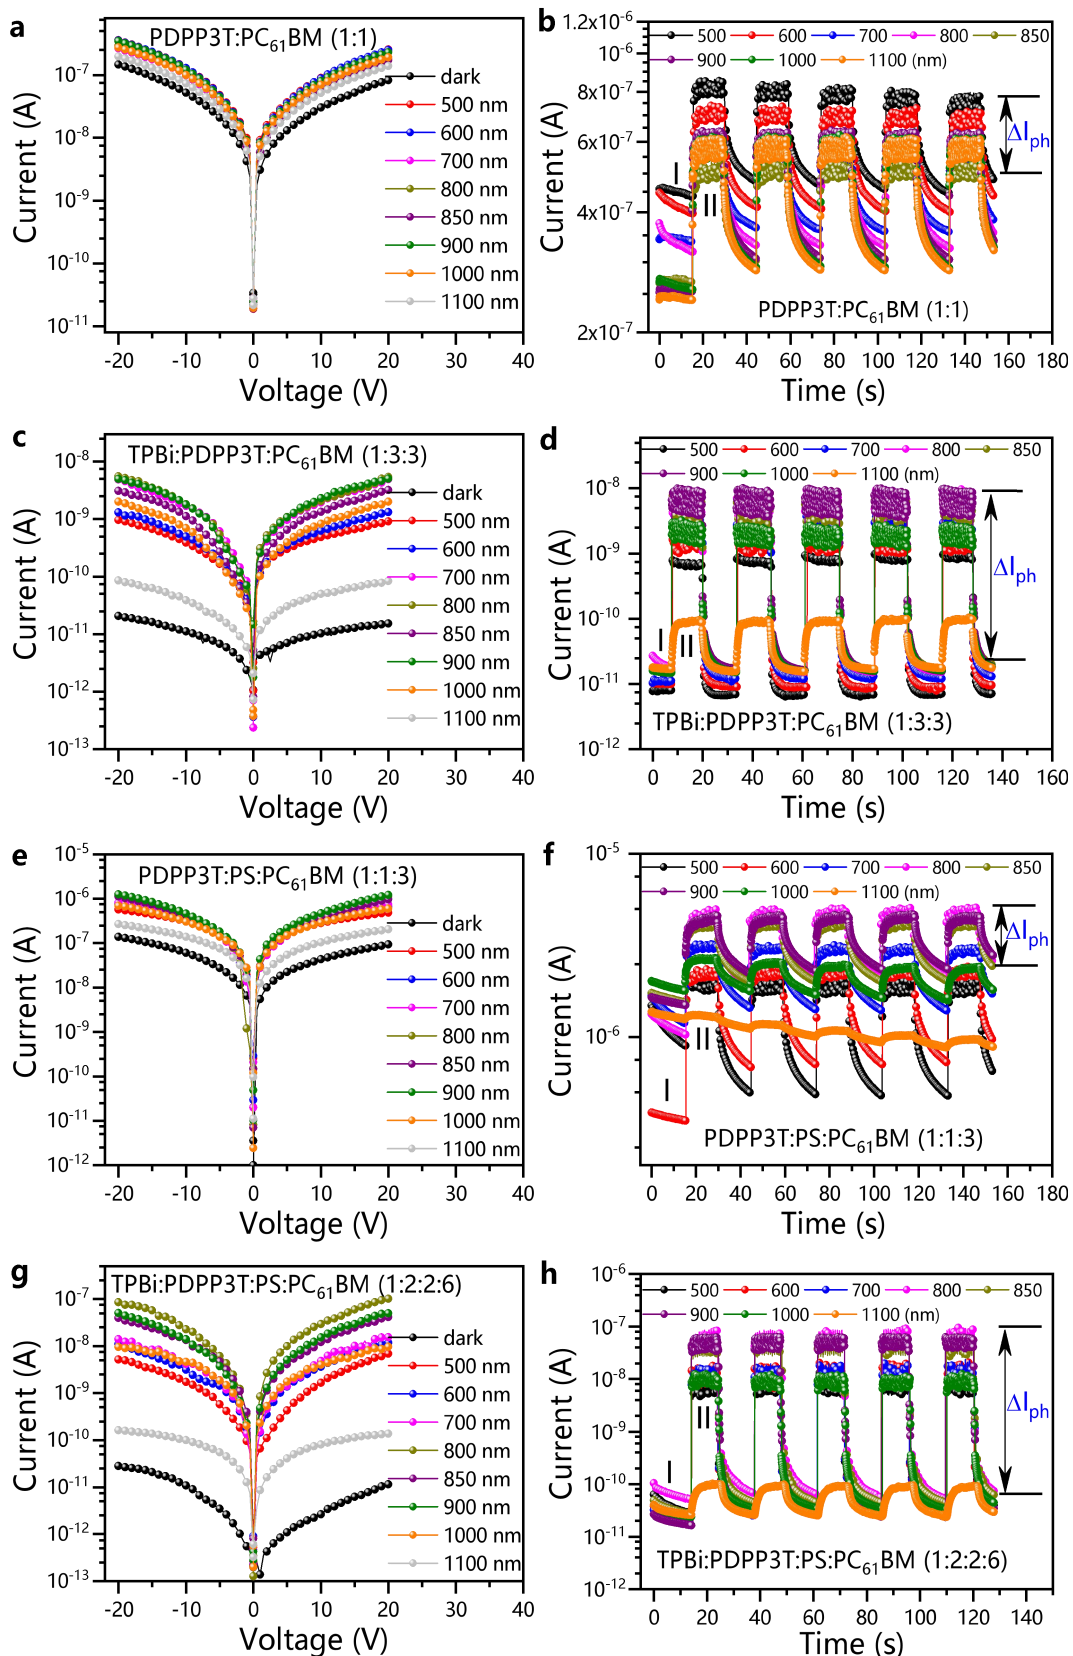

**Supplementary Fig. 10** *I-V* curves and *I-Time* curves of TPBi:PDPP3T:PS:PC<sub>61</sub>BM

L-PPDs exposed to the different wavelength of laser. a, b *I-V* curves and *I-Time*

curves of PDPP3T:PC<sub>61</sub>BM L-PPD with 1:1 ratio. **c, d** *I-V* curves and *I-Time* curves of TPBi:PDPP3T:PC<sub>61</sub>BM L-PPD with 1:3:3 ratio. **e, f** *I-V* curves and *I-Time* curves of PDPP3T:PS:PC<sub>61</sub>BM L-PPD with 1:1:3 ratio. **g, h** *I-V* curves and *I-Time* curves of TPBi:PDPP3T:PS:PC<sub>61</sub>BM L-PPD with 1:2:2:6 ratio. The bias were added at a constant  $V = -20$  V during the *I-Time* curves tested. The light intensity is  $4.5 \text{ mW/cm}^2 @ 850 \text{ nm}$ .

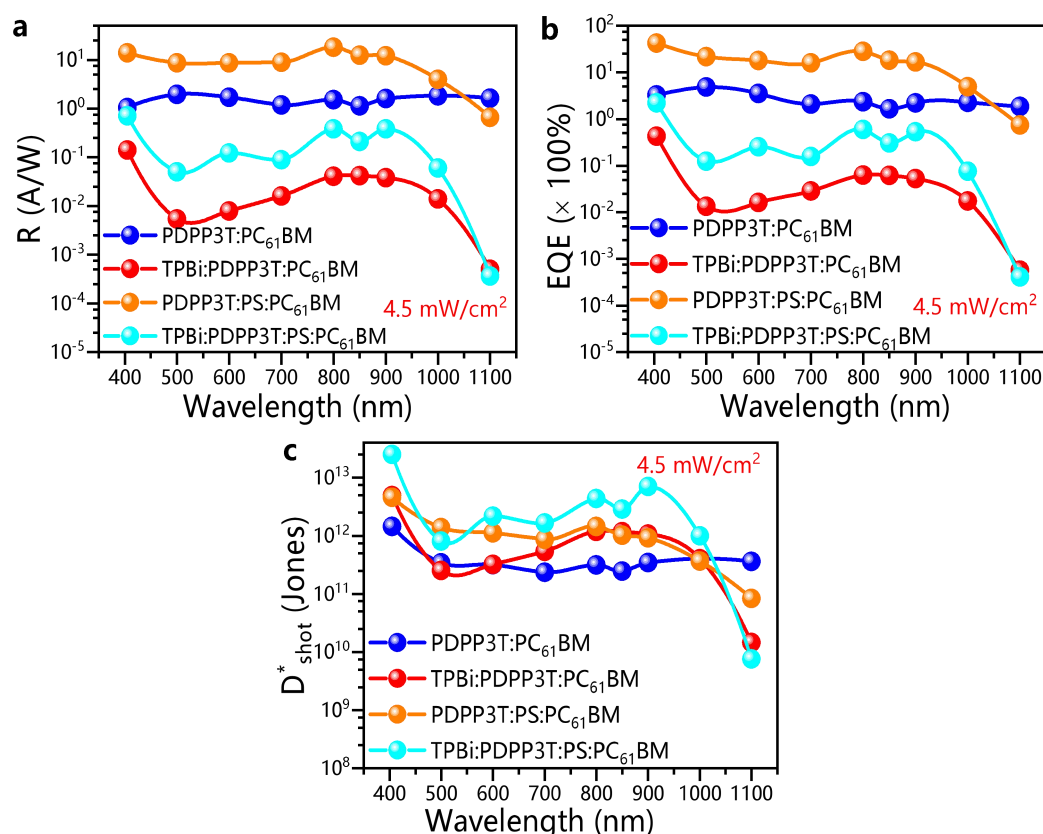

**Supplementary Fig. 11 Electrical properties of TPBi:PDPP3T:PS:PC<sub>61</sub>BM L-PPDs with different doping ratios exposed to the different wavelength of laser. a** Dependence of  $R$  on wavelength. **b** Dependence of EQE on wavelength. **c** Dependence of  $D^*_{\text{shot}}$  on wavelength. The light intensity is  $4.5 \text{ mW/cm}^2$ .

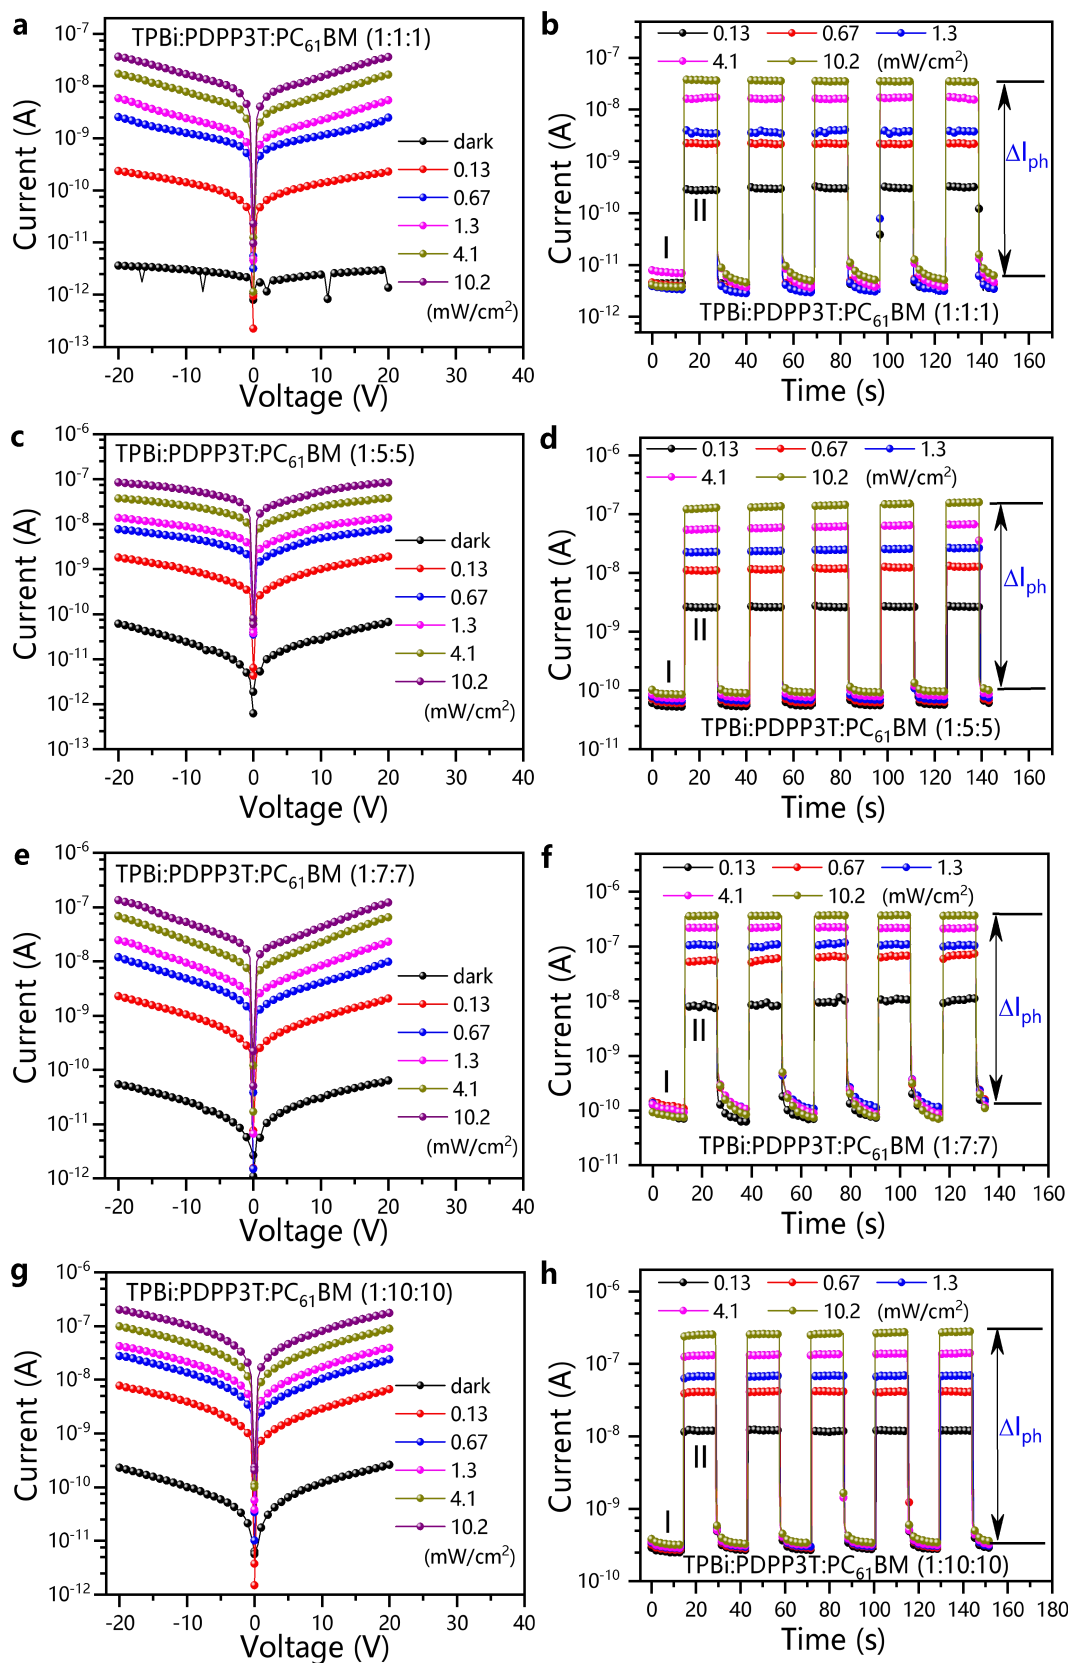

**Supplementary Fig. 12** *I-V* curves and *I-Time* curves of TPBi:PDPP3T:PC<sub>61</sub>BM

L-PPDs exposed to the 405 nm laser. **a, b** 1:1:1 ratio. **c, d** 1:5:5 ratio. **e, f** 1:7:7 ratio. **g,**

h 1:10:10 ratio. The bias were added at a constant  $V = -20$  V during the I-Time curves tested.

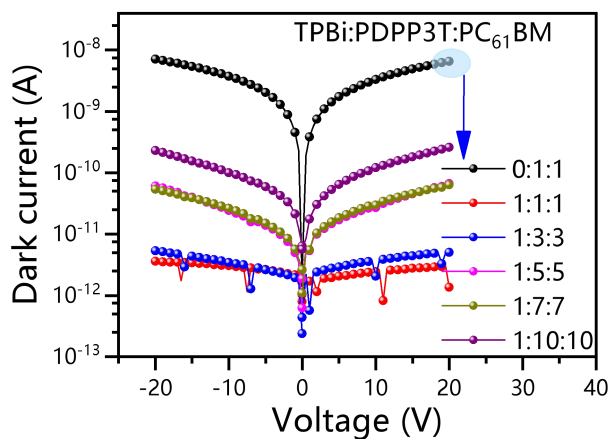

Supplementary Fig. 13 The dark current of TPBi:PDPP3T:PC<sub>61</sub>BM L-PPDs.

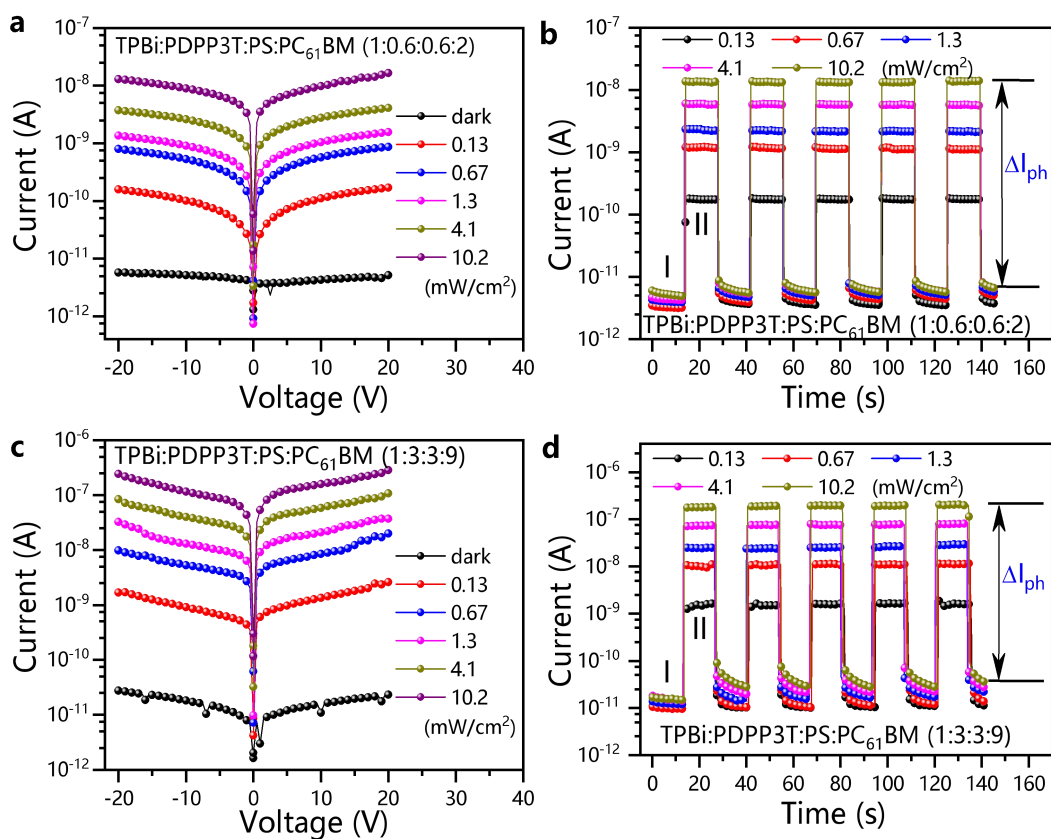

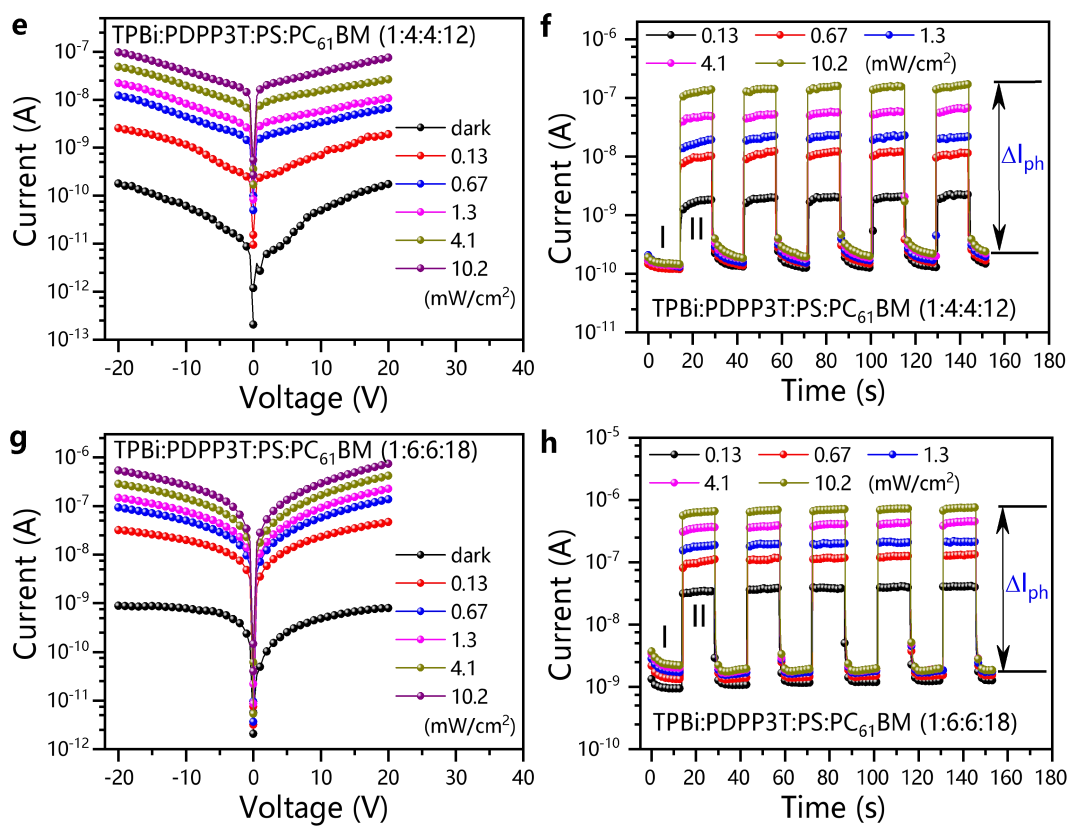

**Supplementary Fig. 14** *I-V* curves and *I-Time* curves of TPBi:PDPP3T:PS:PC<sub>61</sub>BM L-PPDs exposed to the 405 nm laser. **a, b** 1:0.6:0.6:2 ratio. **c, d** 1:3:3:9 ratio. **e, f** 1:4:4:12 ratio. **g, h** 1:6:6:18 ratio. The bias were added at a constant  $V = -20$  V during the *I-Time* curves tested.

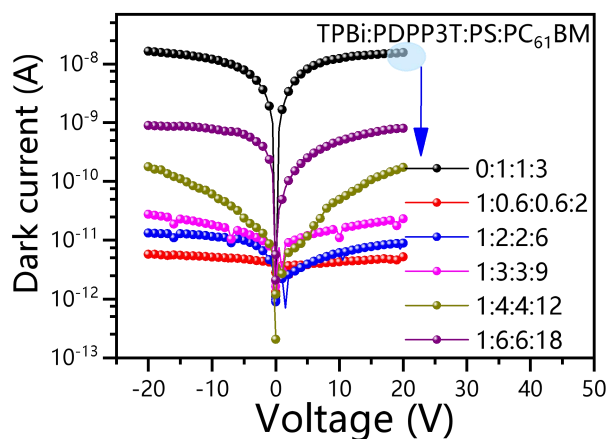

**Supplementary Fig. 15** The dark current of TPBi:PDPP3T:PS:PC<sub>61</sub>BM L-PPDs.

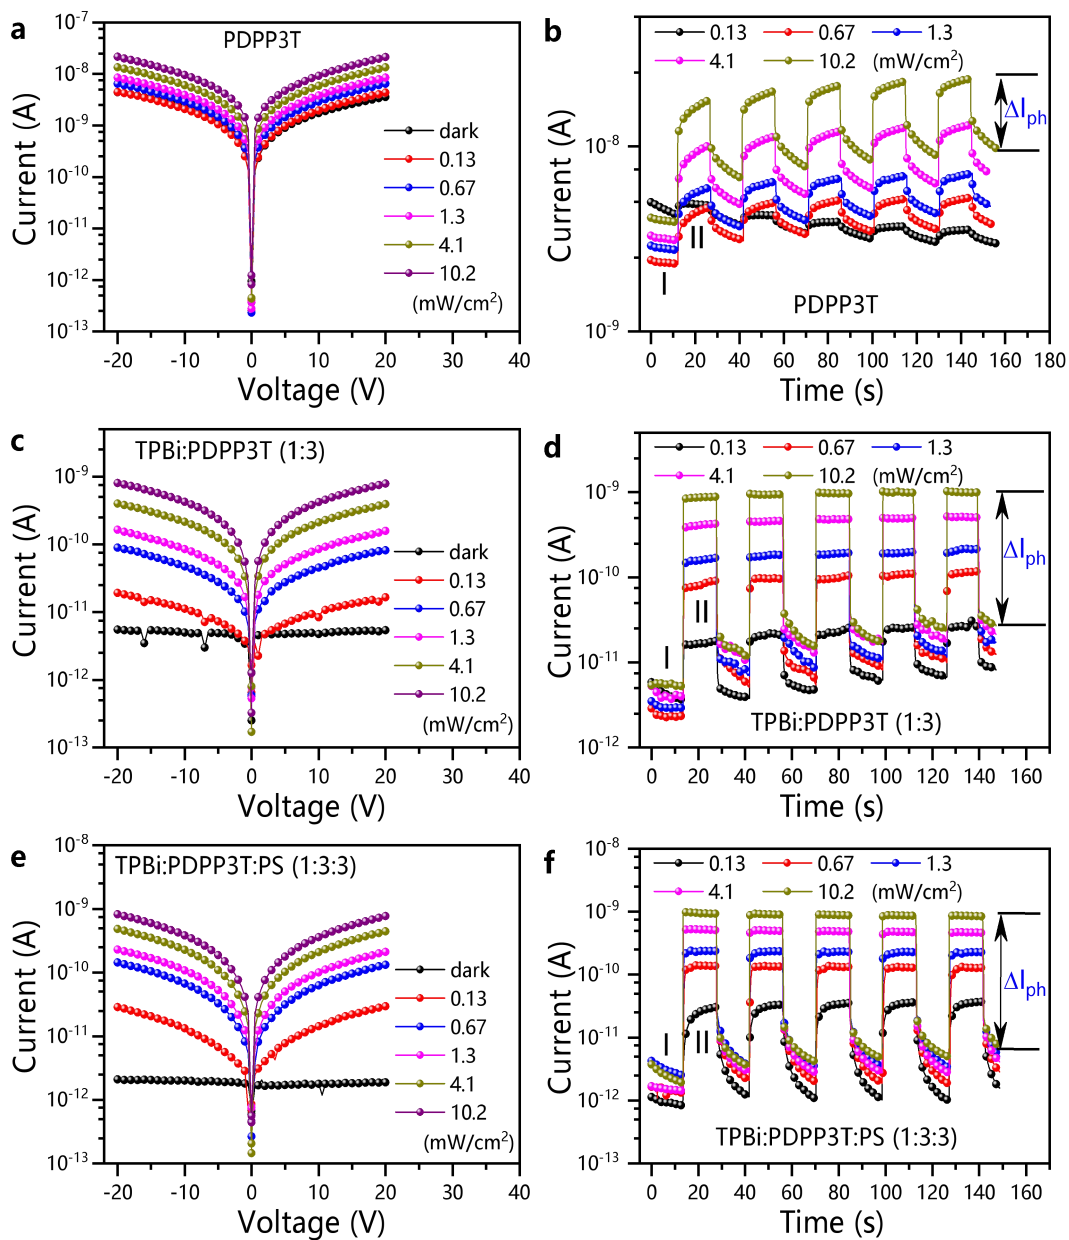

**Supplementary Fig. 16** *I-V* curves and *I-Time* curves of different L-PPDs exposed to the 405 nm laser. **a, b** PDPP3T L-PPD. **c, d** TPBi:PDPP3T L-PPD with 1:3 ratio. **e, f** TPBi:PDPP3T:PS L-PPD with 1:3:3 ratio. The bias were added at a constant  $V = -20$  V during the *I-Time* curves tested.

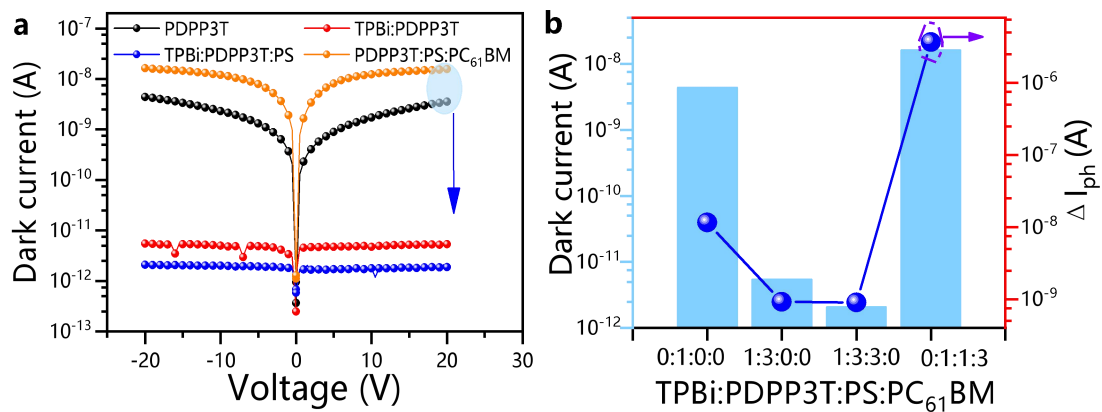

**Supplementary Fig. 17 Electrical properties of different L-PPDs exposed to the 405 nm laser. a** Dark current. **b** Dependence of dark current and  $\Delta I_{ph}$  on different doping ratios.

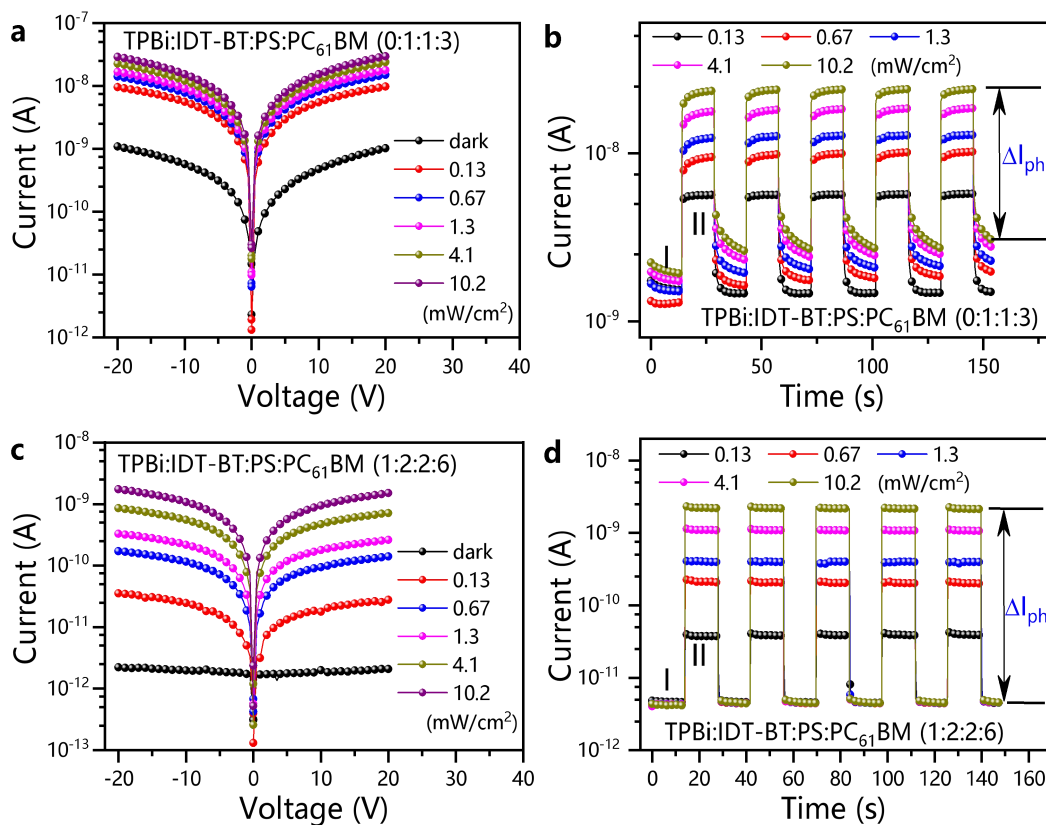

**Supplementary Fig. 18 I-V curves and I-Time curves of TPBi:IDT-BT:PS:PC<sub>61</sub>BM L-PPDs exposed to the 405 nm laser. a, b** 0:1:1:3 ratio. **c, d** 1:2:2:6 ratio. The bias were added at a constant  $V = -20$  V during the I-Time curves tested.

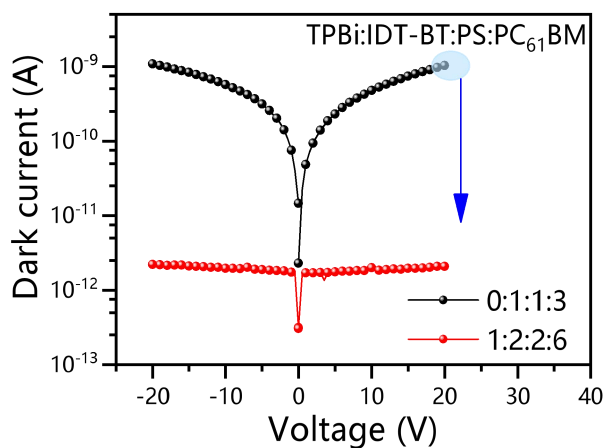

Supplementary Fig. 19 The dark current of TPBi:IDI-BT:PS:PC<sub>61</sub>BM L-PPDs.

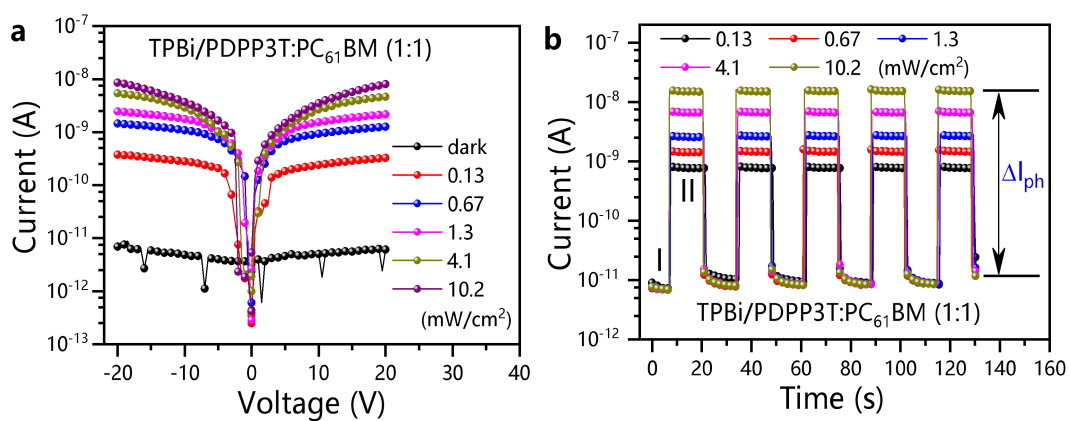

Supplementary Fig. 20 *I-V* curves and *I-Time* curves of TPBi/PDPP3T:PC<sub>61</sub>BM (1:1)

L-PPD exposed to the 405 nm laser. **a** *I-V* curves. **b** *I-Time* curves. The bias were added at a constant  $V = -20$  V during the *I-Time* curves tested.

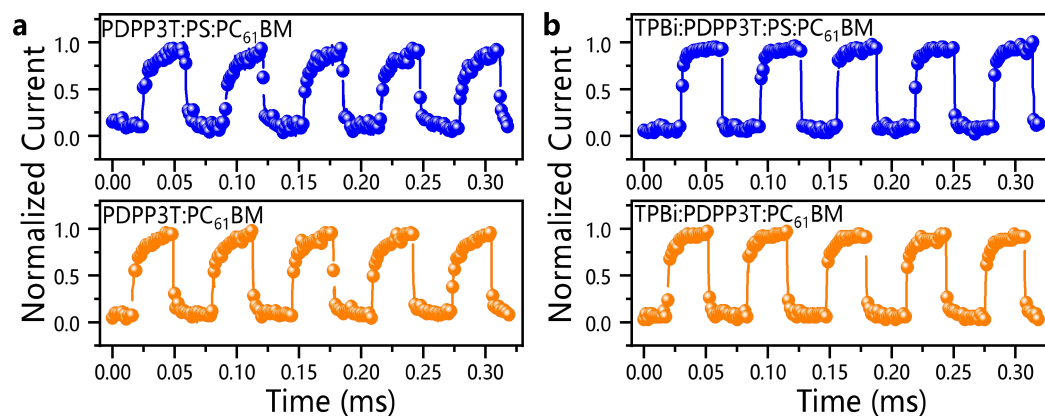

Supplementary Fig. 21 On/off switching properties of different devices. **a**



PDPP3T:PC<sub>61</sub>BM and PDPP3T:PS:PC<sub>61</sub>BM L-PPDs. **b** TPBi:PDPP3T:PC<sub>61</sub>BM and TPBi:PDPP3T:PS:PC<sub>61</sub>BM L-PPDs. The light intensity is 10.42 mW/cm<sup>2</sup> @ 405 nm.

**Table S1.** Summary of the UV-vis spectra and UPS analysis.

|                     | UV-vis absorption                          |                                      | UPS                      |                |                                     |                                     |
|---------------------|--------------------------------------------|--------------------------------------|--------------------------|----------------|-------------------------------------|-------------------------------------|
|                     | $\lambda_{\text{onset}}$ (nm) <sup>a</sup> | $E_g^{\text{opt}}$ (eV) <sup>b</sup> | $E_{\text{Cutoff}}$ (eV) | $E_V-E_F$ (eV) | $E_{\text{HOMO}}$ (eV) <sup>c</sup> | $E_{\text{LUMO}}$ (eV) <sup>d</sup> |
| PDPP3T              | 961                                        | 1.29                                 | 17.93                    | 2.00           | 5.29                                | 4.00                                |
| PC <sub>61</sub> BM | 623                                        | 1.99                                 | 18.35                    | 3.25           | 6.12                                | 4.13                                |
| TPBi                | 362                                        | 3.42                                 | 18.46                    | 3.52           | 6.28                                | 2.86                                |

<sup>a</sup> the absorption onset wavelength of the film, <sup>b</sup> optical bandgap calculated via  $\lambda_{\text{onset}}$ , <sup>c</sup> HOMO levels obtained by the  $E_{\text{Cutoff}}$  and  $E_V-E_F$  values, <sup>d</sup> LUMO levels determined by the  $E_{\text{HOMO}}$  and  $E_g^{\text{opt}}$ .
